# Supplementary material for: Diversity of Matriptase Expression Level and Function in Breast Cancer
Source: PubMed Central journal article supplement (PMC3325989; doi:10.1371/journal.pone.0034182), 2012-04-13
Supplement: pone.0034182.s001.pdf [file pone.0034182.s001.pdf]

# Figure S1

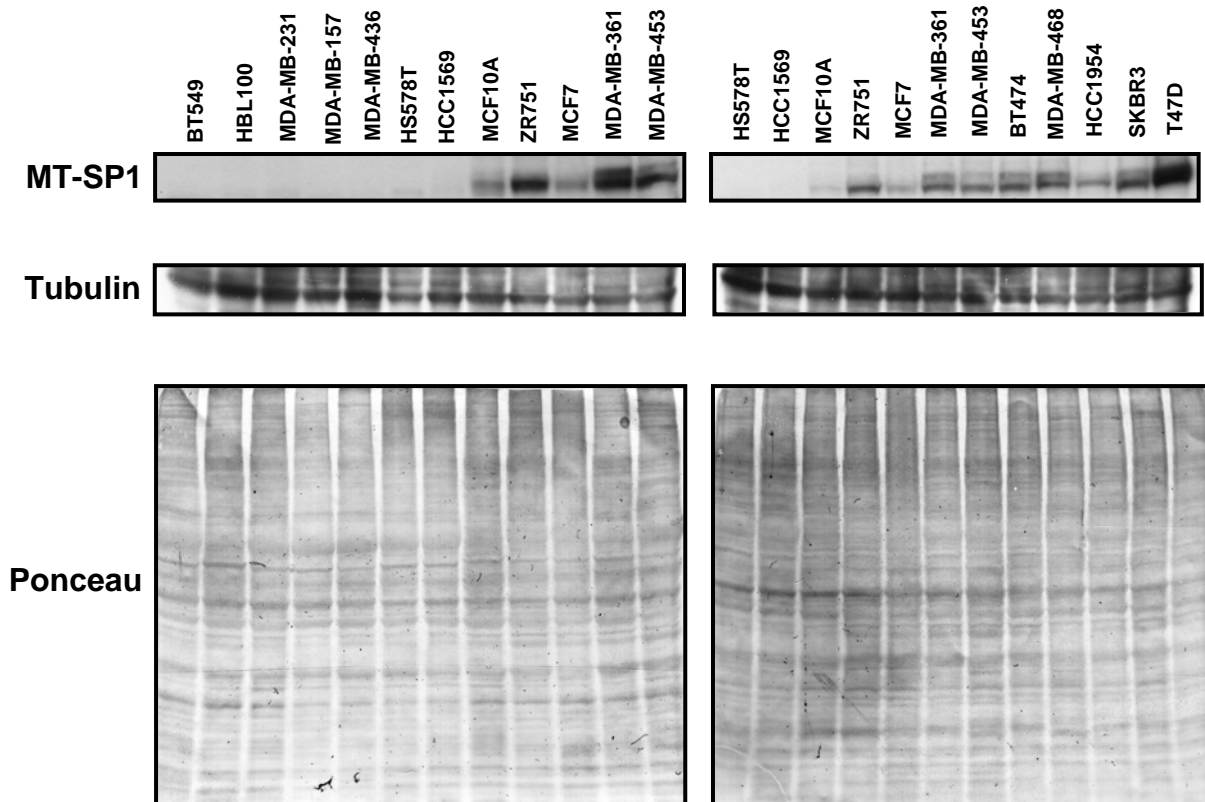

**Figure S1:** Analysis of matriptase (MT-SP1) protein levels in indicated cell lines determined using standard western blotting approach. Tubulin and Ponceau stainings were performed as loading controls.
