# Supplementary material for: Diversity of Matriptase Expression Level and Function in Breast Cancer
Source: PubMed Central journal article supplement (PMC3325989; doi:10.1371/journal.pone.0034182), 2012-04-13
Supplement: pone.0034182.s005.pdf [file pone.0034182.s005.pdf]

**Figure S5**

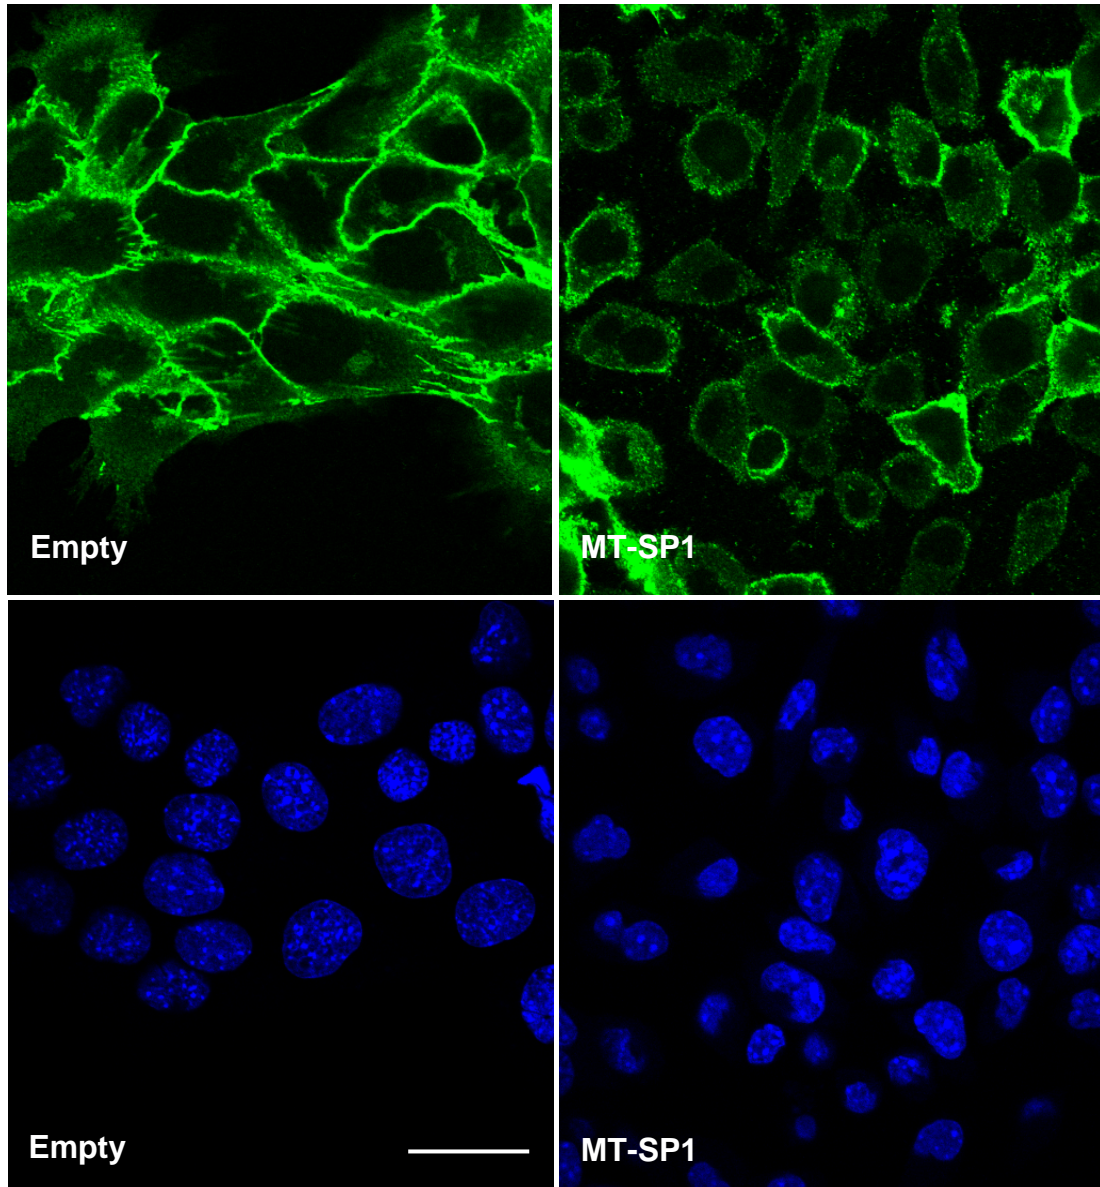

**Figure S5:** Individual images for  $\beta$ -catenin (top) and DAPI (bottom) stainings in 4T1 cells overexpressing MT-SP1 (right) or control cells transfected with empty vector (left). The same images are presented as overlays in Figure 6D. Scale bar 30 $\mu$ M.
