# Supplementary material for: Diversity of Matriptase Expression Level and Function in Breast Cancer
Source: PLOS journal article supplement (doi:10.1371/journal.pone.0034182), 2012-04-13
Supplement: S2 (10.1371/journal.pone.0034182.s002) [file journal.pone.0034182.s002]

**Figure S2 :**

**A**

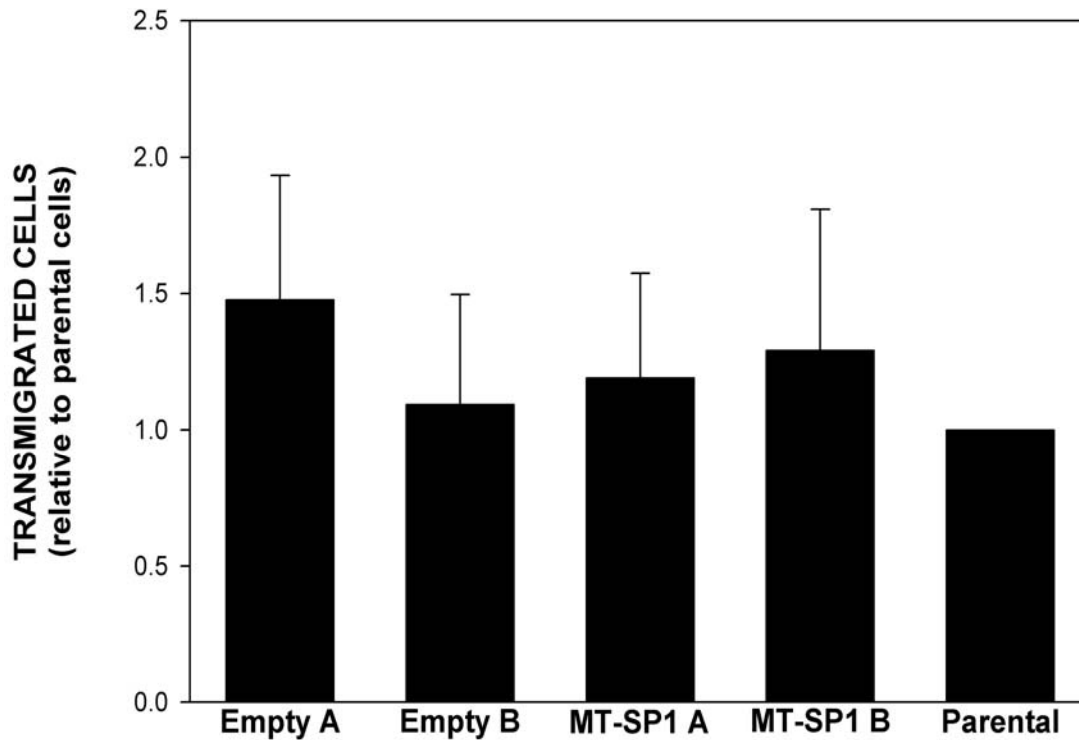

**B**

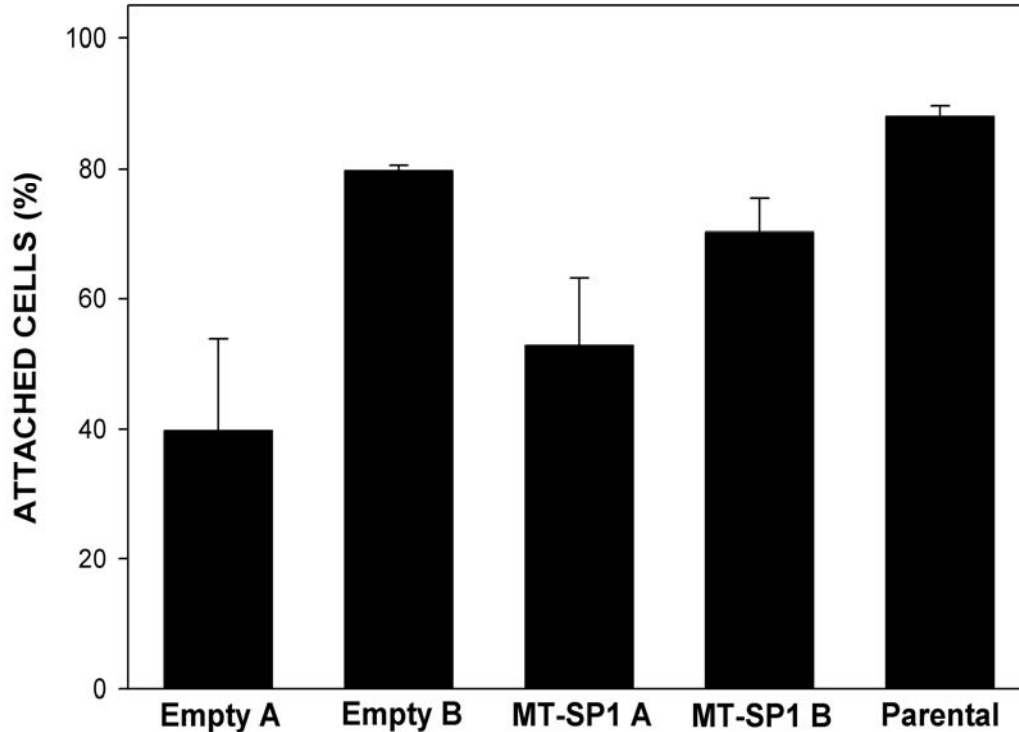

**Figure 2S:** Comparison of in vitro migratory properties (**A**) and attachment strength (**B**) in the indicated MDA-MB-231 clones and the parental cell line. (See materials and methods for details.). No statistically significant differences between the clones were found with respect to in vitro migratory properties ( $p > 0.05$ ). Although some “between-clone” variations were found ( $p < 0.05$ ) with respect to attachment strength, they were not associated with the presence or absence of MT-SP1 overexpression. Error bars represent standard errors.
